# Supplementary material
Source: JCI journal article supplement (doi:10.1172/jci190031)
Supplement: sd1 [file 1]

## Supplemental material for

### Schlafen 5 is an intracellular immune checkpoint and controls interferon responses in pancreatic ductal adenocarcinoma

Mariafausta Fischietti<sup>1,2,#</sup>, Markella Zannikou<sup>1,2,#</sup>, Elspeth M Beauchamp<sup>1,2,3</sup>, Diana Saleiro<sup>1,2</sup>, Aneta H Baran<sup>1,3</sup>, Briana N Hryhorysak<sup>1</sup>, Jamie N Guillen Magaña<sup>1</sup>, Emely Lopez Fajardo<sup>1</sup>, Gavin T Blyth<sup>1</sup>, Brandyn A Castro<sup>4</sup>, Jason M Miska<sup>1,4</sup>, Catalina Lee-Chang<sup>1,4</sup>, Priyam Patel<sup>1</sup>, Elizabeth T Bartom<sup>1,5,6</sup>, Masha Kocherginsky<sup>1,6</sup>, Frank Eckerdt<sup>1,2</sup>, and Leonidas C Platanias<sup>1,2,3,\*</sup>.

<sup>1</sup>Robert H. Lurie Comprehensive Cancer Center of Northwestern University, Chicago, IL, 60611, USA

<sup>2</sup>Division of Hematology/Oncology, Department of Medicine, Feinberg School of Medicine, Northwestern University, Chicago, IL, 60611, USA

<sup>3</sup>Department of Medicine, Jesse Brown Veterans Affairs Medical Center, Chicago, IL, 60612, USA

<sup>4</sup>Department of Neurological Surgery, Feinberg School of Medicine, Northwestern University, Chicago, IL, 60611, USA

<sup>5</sup>Department of Biochemistry and Molecular Genetics, Feinberg School of Medicine, Northwestern University, Chicago, IL, 60611, USA

<sup>6</sup>Division of Biostatistics, Department of Preventive Medicine, Feinberg School of Medicine, Northwestern University, Chicago, IL, 60611, USA

# MF and MZ contributed equally to this work.

**Running Title:** SLFN5, an intracellular immune checkpoint in PDAC

**Financial Support:** Supported by NIH grants R01-CA077816 and R01-NS113352

**Keywords:** Pancreatic ductal adenocarcinoma (PDAC), Schlafen 5 (SLFN5), Interferon (IFN)

**\*Corresponding author:** Leonidas C. Platanias; 303 East Superior Street, Lurie- 3125, Chicago, IL 60611; email: [l-platanias@northwestern.edu](mailto:l-platanias@northwestern.edu)

**Conflict of Interest Statement:** No potential conflicts of interest were disclosed related to the content of this manuscript.

Supplementary Figure S1

**A**

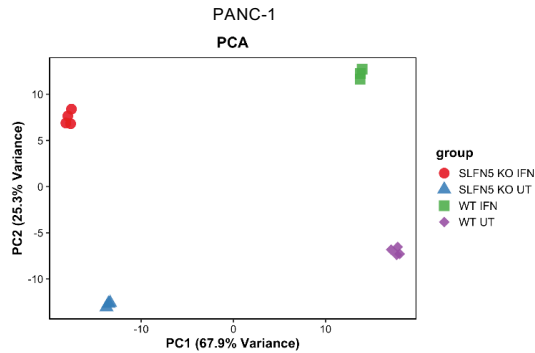

**B**

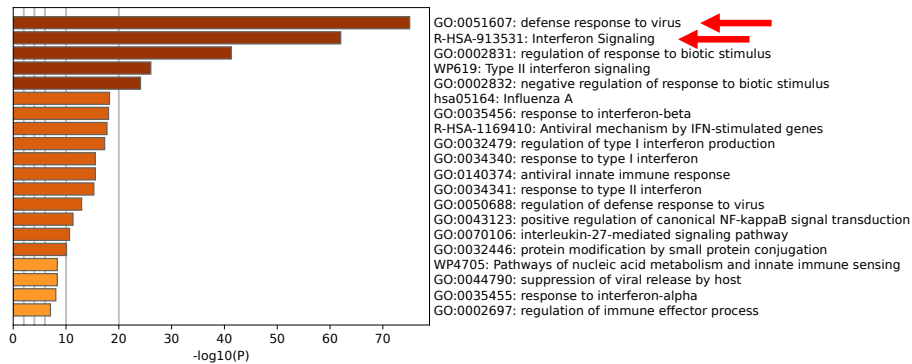

**Figure S1. IFN $\alpha$  induces transcription of ISGs in pancreatic cancer cells. (A,B)** RNA-seq analysis of transcript expression in *SLFN5* WT and *SLFN5* KO PANC-1 cells untreated or treated with human IFN $\alpha$  (5000 IU) for 6 hours. **(A)** Principal Component Analysis (PCA) of indicated groups. **(B)** Ontology analysis of the 199 genes that were found to be  $\geq 2$ -fold higher expressed in IFN $\alpha$  treated *SLFN5* KO cells. Note that red arrows highlight “defense response to virus” and “Interferon Signaling” pathways.

Supplementary Figure S2

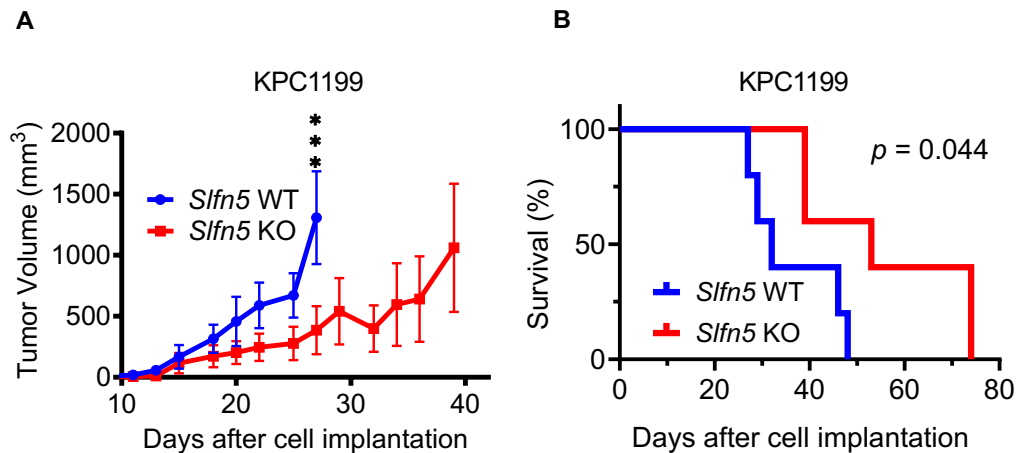

**Figure S2. Genetic deletion of *Slfn5* results in potent anti-tumor effects. (A)** *Slfn5* WT (n=5) and *Slfn5* KO (n=5) KPC1199 cells ( $1 \times 10^5$  cells/mouse) were injected subcutaneously into the right flank of 6-8 weeks old C57BL/6NTac female mice (Taconic). *Slfn5* WT and KO tumor volumes are shown until the day the first mouse of each group had to be euthanized. On day 27, model-based estimate of the mean difference in tumor volume between groups was  $921.2 \text{ mm}^3$  (95% CI: 342 to 1500). Two-way ANOVA with Sidak's multiple comparison test for day 27. Comparison of tumor volumes on day 27 is based on Mixed-effects model up to day 27. Data are expressed as means  $\pm$  SEM of tumor volumes for each genotypic group; \*\*\*,  $p = 0.0002$ . **(B)** Kaplan-Meier survival curves of mice as in (A). Survival was estimated using the method of Kaplan-Meier and groups were compared using the log-rank test; \*,  $p = 0.0446$ .

Supplementary Figure S3

**A**

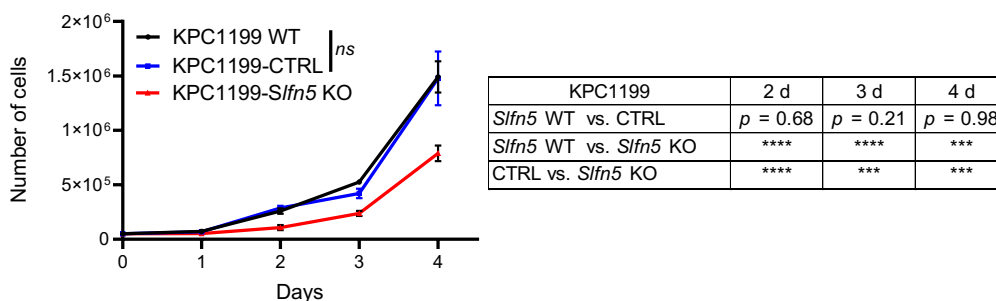

**B**

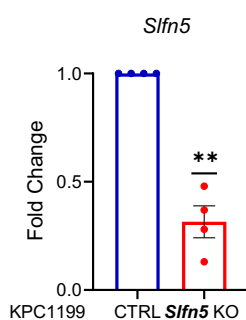

**C**

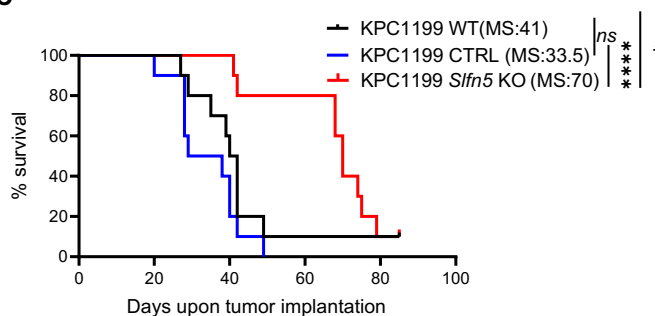

**D**

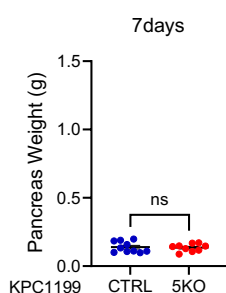

**E**

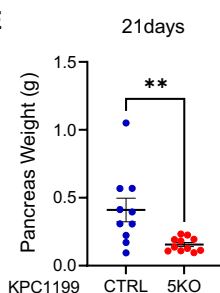

**Figure S3. Generation and characterization of Cas9 CTRL KPC1199 cells.** (A) Luciferase-expressing KPC1199 WT, CTRL or *Sfn5* KO cells were plated in 6-well plates and counted at days 1, 2, 3 and 4 after seeding. Data are means of number of cells  $\pm$  SEM of three independent experiments, each done in duplicate. Statistical analysis was performed using ordinary two-way analysis of variance (ANOVA) with time and treatment group as predictors, followed by Tukey's multiple comparisons test and comparisons are shown in the table. The outcomes were log<sub>2</sub>-transformed to satisfy the normality assumption; \*\*\*,  $p < 0.001$ ; \*\*\*\*,  $p < 0.0001$ . (B) Quantitative PCR (RT-qPCR) analysis to monitor efficacy of CRISPR/Cas9 mediated *Sfn5* disruption. Data are expressed as means  $\pm$  SEM of four independent experiments and are represented as fold change normalized to their corresponding Cas9 control (CTRL). Statistical analysis was contacted using a One-sample student's *t*-test compared to a fold change of 1; \*\*,  $p = 0.0027$ . (C) Luciferase-expressing KPC1199 WT (n=10), CTRL (n=10), or *Sfn5* KO (n=10) cells ( $5 \times 10^4$  cells/mouse) were

injected into the pancreatic tails of 6-8 weeks old male and female C57BL/6J mice. Survival curves of indicated mice are shown. Survival was estimated using the method of Kaplan-Meier and groups were compared using the log-rank test; \*,  $p = 0.0497$  ; \*\*\*\*,  $p < 0.0001$ . **(D,E)** Mouse pancreatic weight (g). KPC1199 CTRL or *Sfn5* KO cells ( $5 \times 10^4$  cells/mouse) were injected into the pancreatic tails of 6-8 weeks old C57BL/6J mice (males and females) and after either 7 days (CTRL, n=10; *Sfn5* KO, n=9) or 21 days (CTRL, n=10; *Sfn5* KO, n=11) the pancreatic weight was assessed. One-tailed unpaired *t*-test with Mann-Whitney test; \*\*,  $p < 0.01$ .

Supplementary Figure S4

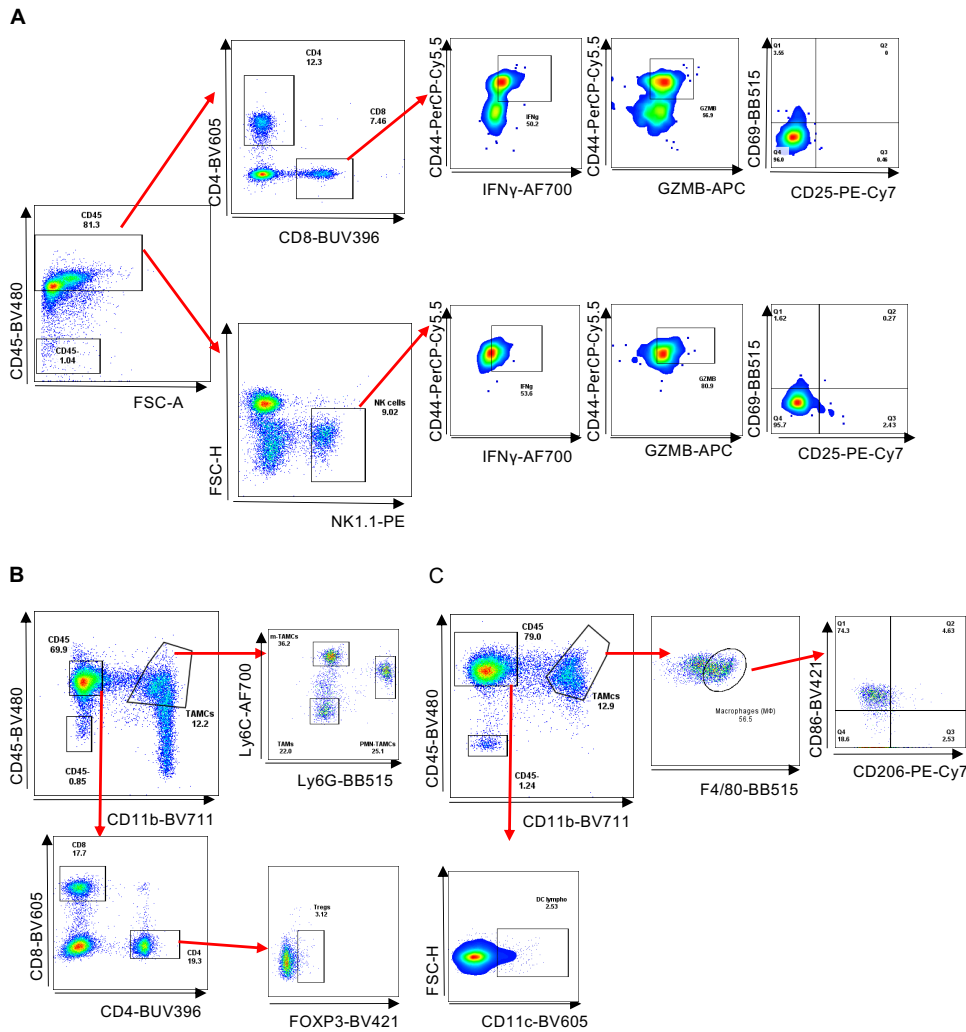

**Figure S4. Gating strategy for flow cytometric immunophenotyping of mouse pancreatic tumors.** (A) Representative images of the flow cytometric gating strategy used to assess the percentages of CD45<sup>+</sup> cells, CD4, CD8, NK cells in KPC1199 pancreatic tumors shown in figure 4A using anti-CD45-BV510, CD8-BV605, CD4-BUV396, and NK1.1-PE antibodies with further analysis of IFN $\gamma$ -, granzyme B-, CD69-, and CD25- expression using CD44-PerCP-y5.5, IFN $\gamma$ -AF700, GZMB-APC, CD69-BB515 and CD25-PE-Cy7. (B) Representative images of the flow cytometric gating strategy used to assess the percentages of CD45<sup>+</sup> cells, TAMCs, m-TAMCs, PMN-TAMCs and TAMs using anti- CD45-BV510, CD11b-BV711, Ly6G-BB515 and Ly6C-AF700 antibodies and the percentages of Tregs, CD8<sup>+</sup> T cells, and CD4<sup>+</sup> T cells using CD8-BV605, CD4-BUV396, and FOXP3-BV421. (C) Representative images of the flow cytometric gating strategy used to assess the percentages of CD45<sup>+</sup> cells, TAMCs, Macrophages(M $\Phi$ ), M1 M $\Phi$ , M2 M $\Phi$  and dendritic cells (DC lympho) in KPC1199 pancreatic tumors using anti-CD45-BV480, CD11b-BV711, macrophages-F4/80-BB515, M1 M $\Phi$ -CD86-BV421, M2 M $\Phi$ -PE-Cy7 and DC lympho-BV-605.

Supplementary Figure S5

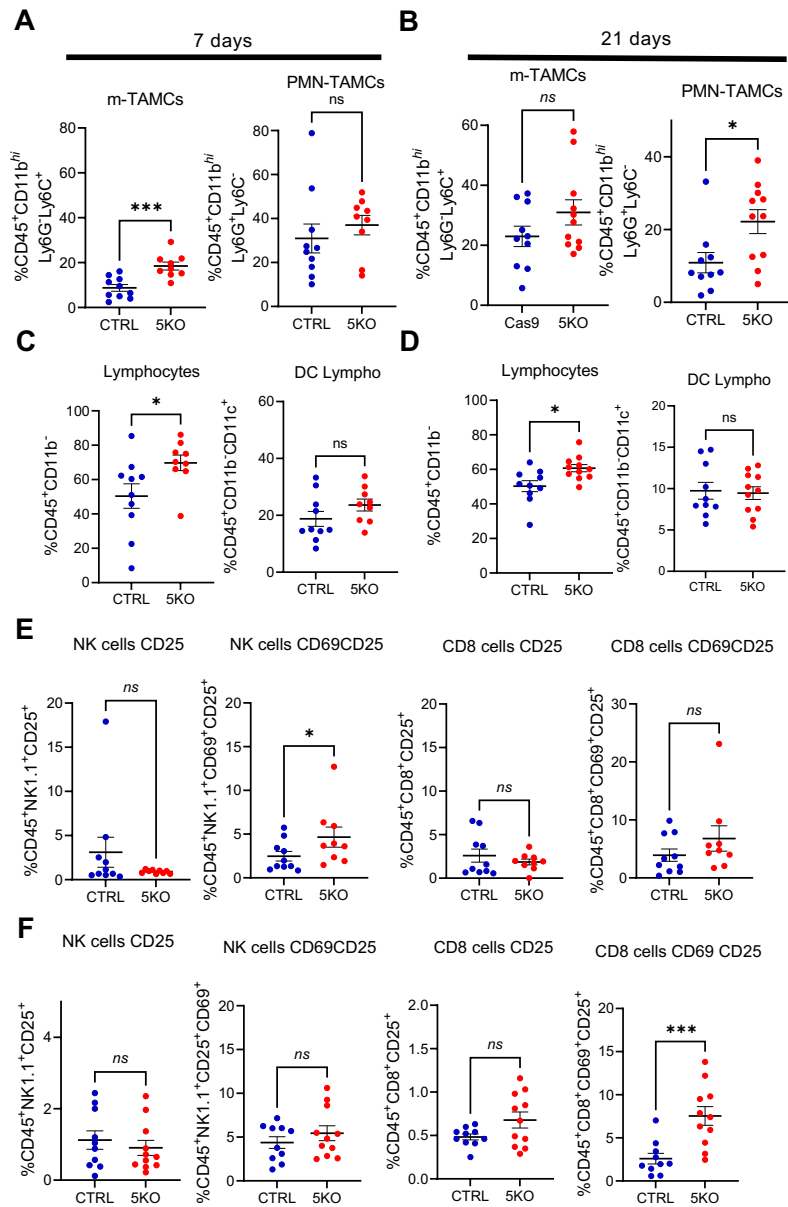

**Figure S5. Loss of *Sfn5* is associated with alterations within the immune-suppressive PDAC TME.**

**(A-F)** Immunophenotypic analysis of tumor-bearing pancreases by multicolor flow cytometry. **(A, C, E)** *Sfn5* CTRL (n=10) and *Sfn5* KO (n=9) luciferase-expressing KPC1199 cells ( $5 \times 10^4$  cells/mouse) were injected into the pancreatic tails of C57BL/6J mice, and 7 days after cell implantation CTRL and *Sfn5* KO tumor-bearing pancreases were harvested and processed for immunophenotypic analysis by multicolor flow cytometry. **(B, D, F)** CTRL (n=10) and *Sfn5* KO (n=11) luciferase-expressing KPC1199 cells ( $5 \times 10^4$  cells/mouse) were injected into the pancreatic tails of C57BL/6J mice and 21 days after cell implantation, CTRL and *Sfn5* KO tumor bearing pancreases were harvested and processed for

immunophenotypic analysis by multicolor flow cytometry. Scatter dot plots show the percentage of tumor-infiltrating cells. **(A,B)** immunosuppressive cells, i.e. m-TAMCs (left panel) and PMN-TAMCs (right panel). **(C, D)** i.e., lymphoid cells (left panel) and dendritic cells (right panel). **(E)** activation markers (CD69, CD25) of NK and CD8 T cells 7 days upon implantation. **(F)** activation markers (CD69, CD25) of NK and CD8 T cells 21 days upon implantation. Data are expressed as means  $\pm$  SEM of percentages of indicated immune infiltrates as detailed in supplementary figure S2. Two-tailed unpaired *t*-test with Mann-Whitney test; \*,  $p < 0.05$ ; \*\*,  $p < 0.01$ ; \*\*\*,  $p < 0.001$ ; \*\*\*\*,  $p < 0.0001$ .
